# Supplementary material for: Fluid Resuscitation via Colon Alleviates Systemic Inflammation in Early Stage of Rats With Severe Acute Pancreatitis
Source: Research Square preprint supplement (doi:10.21203/rs.3.rs-146780/v1), 2021-01-25

## Fluid Resuscitation Via Colon alleviates systemic inflammation in early stage of rats with severe acute pancreatitis

Tongtian Ni<sup>#</sup>, Lili Xu<sup>#</sup>, Silei Sun, Li Ma, Bing Zhao, Weijun Zhou, Yi Wen, Ning Ning, Erzhen Chen, Ying Chen<sup>\*</sup>, Enqiang Mao<sup>\*</sup>

Department of Emergency, Ruijin Hospital, affiliated to Shanghai Jiao Tong University School of Medicine, Shanghai, China

**Supplementary Figure S1.** Uncropped western blot images corresponding to Figure 1A(a), Figure 1B(b), Figure 2A(c), Figure 2B(d)

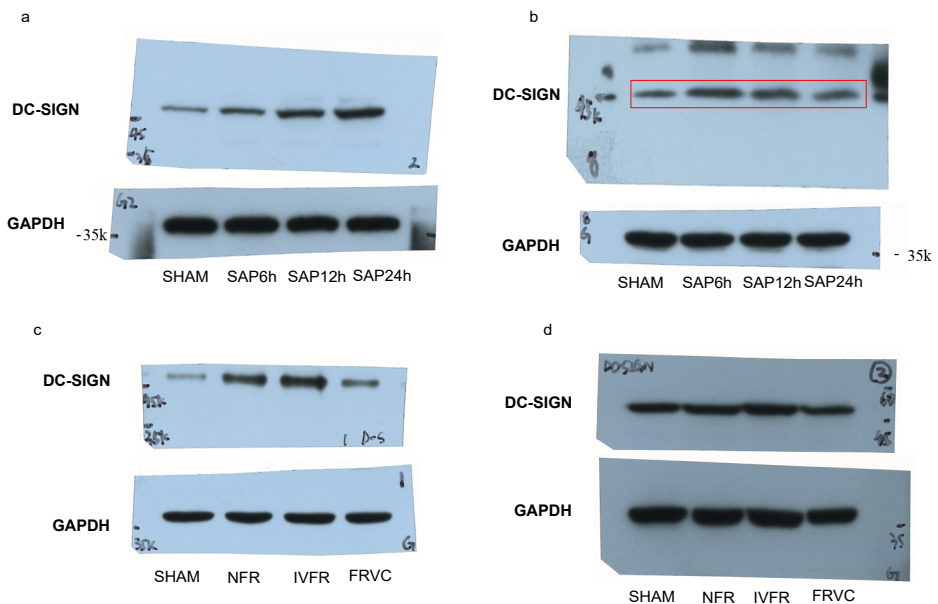

Supplement: Supplementary file [file 03d2940d6698264ac956d4c2.pdf]
